# Supplementary material
Source: publisher figshare collection journal article supplement (https://karger.figshare.com/ndownloader/files/10836389)
Supplement: Supplementary file 1 [file 10836389]

Supplemental data

Legends

Figure 1. A 54 year-old man whose calcium score was 15.9, showing extensive plaque affecting the all three major coronary vessels. Upper panel displays images are surface rendered (A) and maximum intensity (B) three dimensional whole heart images. The bottom panel shows right (C) and left (D) coronary arteries as multi-planar reformatted images. Red arrows point to areas of atherosclerotic plaque.

Figure 2. A 37 year-old man with a calcium score of 14.4 showing extent of large plaque affecting the left anterior descending coronary artery. Middle panel shows maximum intensity (A) and surface rendered (B) projected three dimensional images of the whole heart. Left coronary (C) artery is shown in multi-planer reformatted images. Red arrows point to areas of atherosclerotic plaque.
